## Correction: How Does Cross-Reactive Stimulation Affect the Longevity of CD8+ T Cell Memory?

Vitaly V. Ganusov, Sergei S. Pilyugin, Rafi Ahmed, Rustom Antia

DOI: 10.1371/journal.pcbi.0020055

In *PLoS Computational Biology*, volume 2, issue 6:

The Figure 5 title and legend should read:

**Figure 5.** Variance of the Natural Logarithm of Size of Memory Lineages  $\sigma_{lny}^2$  as the Function of the Number of Exposures in the Absence (squares,  $\sigma_g^2 = 0$ ) and Presence (diamonds,  $\sigma_g^2 \approx 6.9 \cdot 10^{-6}$ ) of Variation in Cross-Reactivity between Different Memory Lineages. Other parameters are the same as in Figure 2B and 2D, and the mean cross-reactivity is kept the same at  $\bar{g} \approx 2 \cdot 10^{-3}$ . Lines show the predictions according to Equation 9,  $\sigma_{lny}^2 = 2 \cdot 10^{-3} (\ln 2)^2 t$  ( $\sigma_g^2 = 0$ ) and  $\sigma_{lny}^2 = 2 \cdot 10^{-3} (\ln 2)^2 t + 6.9 \cdot 10^{-6} \cdot (\ln 2)^2 t^2$  ( $\sigma_g^2 > 0$ ).

This correction note may be found online at DOI: 10.1371/journal.pcbi.0020097.

Published July 28, 2006

Citation: Correction: How does cross-reactive stimulation affect the longevity of CD8+ T cell memory? *PLoS Comput Biol* 2(7): e97.

DOI: 10.1371/journal.pcbi.0020097
